# Supplementary material for: Performance of ASLC1/LHX8 DNA methylation and extended HPV genotyping in first-void urine for high-grade cervical intraepithelial neoplasia detection in an HPV-positive referral population - a cross-sectional study
Source: Research Square preprint supplement (doi:10.21203/rs.3.rs-8249226/v1), 2025-12-11
Supplement: Supplementary file 1 [file 1a2c456bc2f7c2f2f45652f9.docx]

**Supplementary Figures:**

**Figure S1:** Boxplots of DNA methylation levels of *ASCL1* and *LHX8* (log2-transformed ΔCq ratios; y-axis) in HPV-positive cervical samples (A-B, n=264) relative to reference gene *ACTB* according to cervical disease categories (x-axis). Boxplots show medians with lower and upper quartiles and range whickers. A P-value, after Bonferroni correction for multiple testing of 0.0125 was considered to be significant. Abbreviations: ns: non-significant, CIN: cervical intraepithelial neoplasia (CIN) grade 1-3; CNTRL: women with no dysplasia or CIN1 (≤CIN1), CIN2: CIN grade 2, CIN3: CIN grade 3, AIS: adenocarcinoma in situ. CC: cervical cancer.

| A *ASCL1* p<0.001  p<0.001  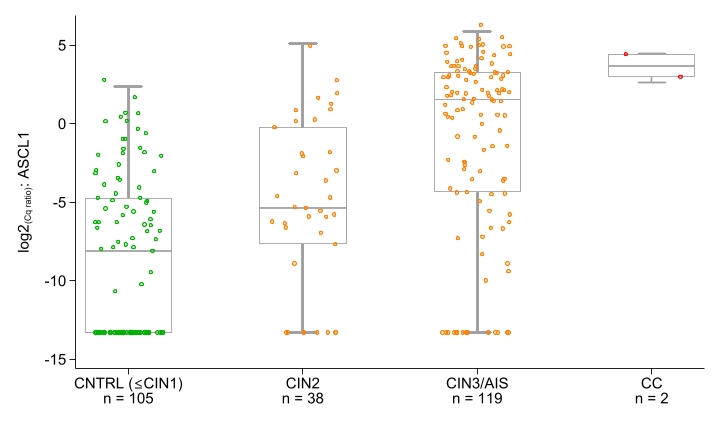  p<0.001  P<0.001 | B  *LHX8* p<0.001  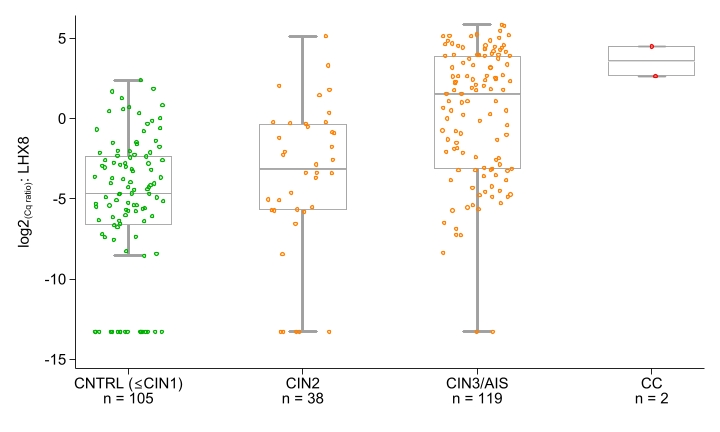  ns  p<0.001  p<0.001 |
| --- | --- |

**Figure S2:** Conditional scatterplots illustrating the DNA methylation levels (log2-transformed ΔCq ratios; y-axis) for *ASCL1* (Figure A) and *LHX8* (Figure B) for paired HPV-positive first-void urine (FVU) and cervical samples (CS) (n=264) stratified by histological endpoints. CIN: cervical intraepithelial neoplasia, grade 1-3; CNTRL: women with no dysplasia or CIN1 (≤ CIN1), CIN2: CIN grade 2, CIN3: CIN grade 3, AIS: adenocarcinoma in situ. CC: cervical cancer. P-value: testing for differences in median DNA methylation levels between paired sample types.

| A | **CNTRL (n=105)** | **CIN2 (n=38)** | **CIN3/AIS (n=119)**  p<0.001 | **Cancers (n=2)**  p<0.001 |
| --- | --- | --- | --- | --- |
|  | p<0.001  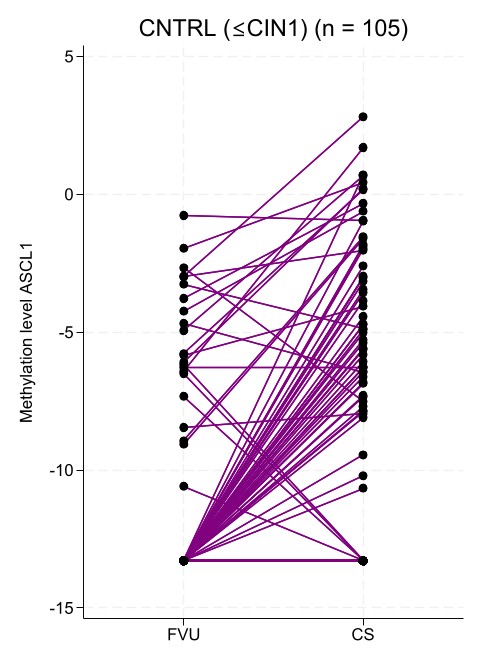 | p<0.001  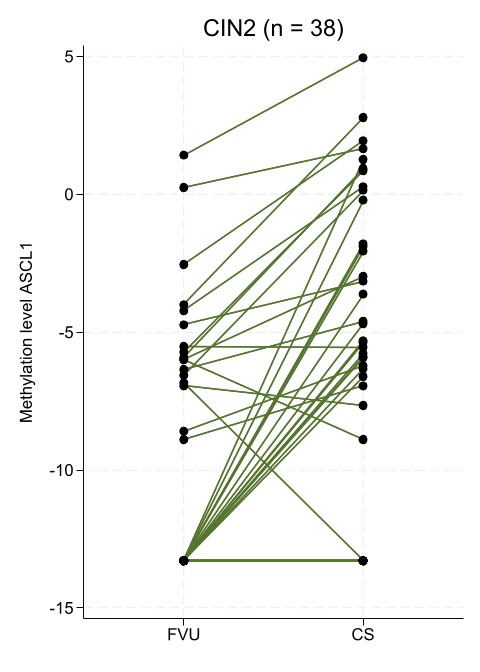 | 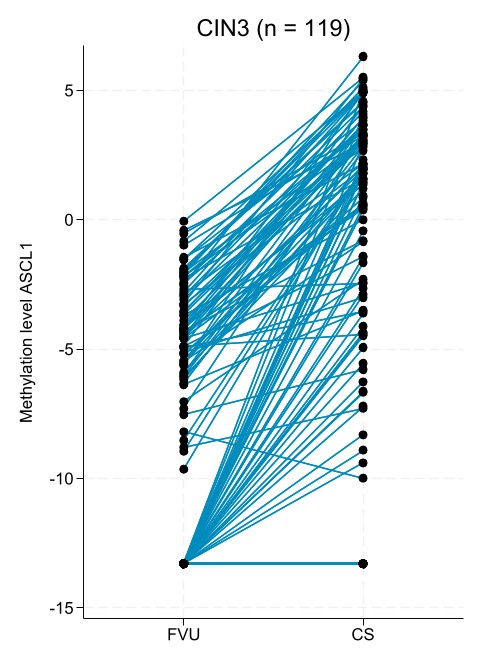 | 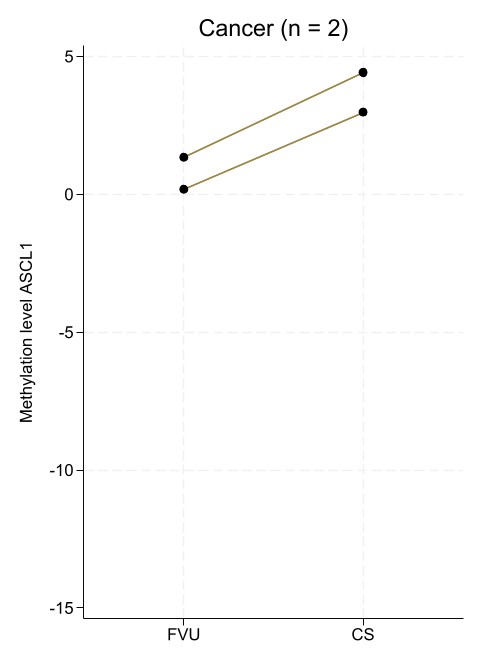 |
| B | p<0.001  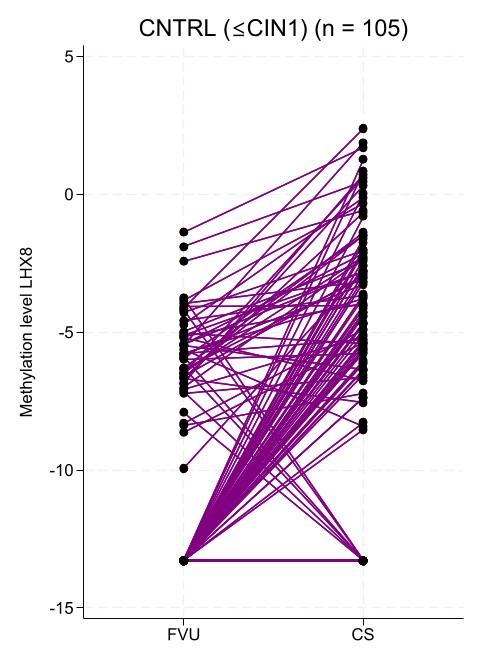 | p<0.001  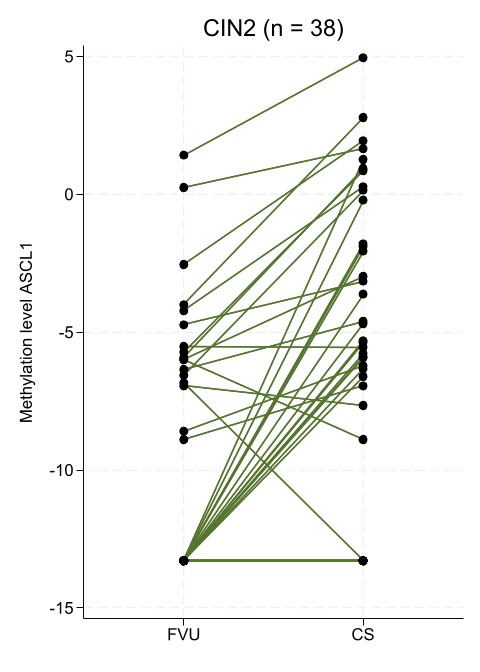 | p<0.001  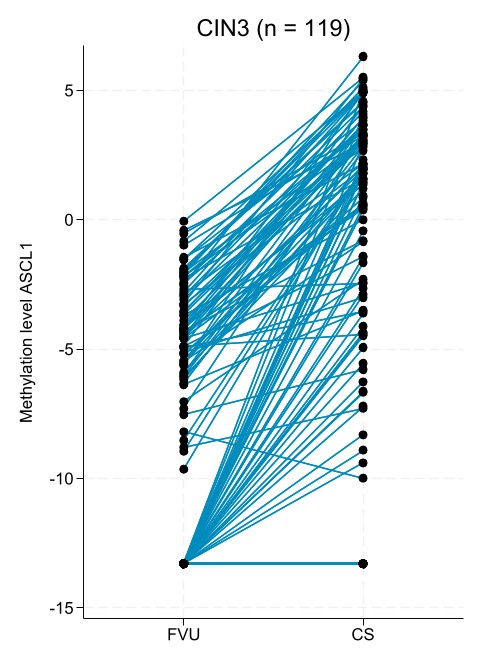 | p<0.001  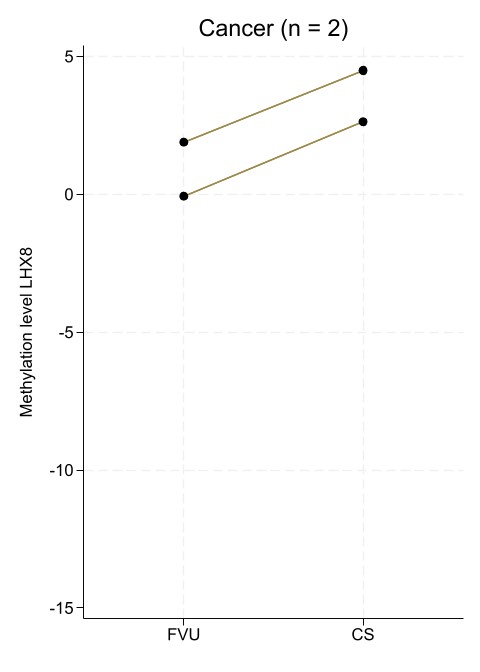 |

**Figure S3:** ROC curves illustrating the performance of the *ASCL1/LHX8* DNA methylation marker panel in paired HPV-positive cervical (A-B) and first-void urine (C-D) samples to discern CIN3+ vs ≤CIN1 (n=226) and CIN2+ vs ≤CIN1 (n=264). Receiver Operating Characteristic (ROC) curves and corresponding area under the curves (AUCs) with 95% CIs are shown. CIN: Cervical Intraepithelial Neoplasia (CIN), grade 1 to 3. CNTRL: women with no dysplasia or CIN grade 1 (≤ CIN1). CIN3+: CIN grade 3, AIS: adenocarcinoma in situ, and cancer. CIN2+: CIN grade 2, CIN3, AIS, and Cancer.

| *A ASCL1/LHX8* | ***B ASCL1****/****LHX8*** |
| --- | --- |
| **Cervical samples**  **CNTRL (≤CIN1) vs CIN3+**    **AUC: 0.84  95% CI: 0.79-0.89** | **Cervical samples**  **CNTRL (≤CIN1) vs CIN2+**    **AUC: 0.80  95% CI: 0.75-0.85** |

| *C ASCL1/LHX8* | ***D ASCL1****/****LHX8*** |
| --- | --- |
| **First-void urine**  **CNTRL (≤CIN1) vs CIN3+**    **AUC: 0.75 95% CI: 0.69-0.82** | **First-void urine**  **CNTRL (≤CIN1) vs CIN2+**    **AUC: 0.73  95% CI: 0.67-0.79** |

**Figure S4:** ASCL1/LHX8 methylation positivityin relation to HPV genotypes detected in HPV-positive first-void samples and cervical disease categories. CIN: cervical intraepithelial neoplasia, grade 1-3; CNTRL: women with no dysplasia or CIN1, CIN2: CIN grade 2, CIN3+: CIN3, adenocarcinoma in situ, and cancer. Multiple HPV infections were counted as separate attributions. HPV: human papillomavirus, CIN cervical intraepithelial neoplasia, N total number of samples, CI confidence interval. *) ASCL1/LHX8 methylation positivity threshold in first-void urine was set at predefined 70% specificity for ≤CIN1 as defined by Van Keer et al (in revision). **) Other alpha-7/9 types: HPV31, 33, 35, 39, 45, 52, 58, 59, and 68. ***)Non-alpha-7/9 types: HPV51, 56, and 66.

| **CNTRL (n=123)** | | | **CIN2 (n=38)** | | | **CIN3+ (n=125)** | | |
| --- | --- | --- | --- | --- | --- | --- | --- | --- |
| 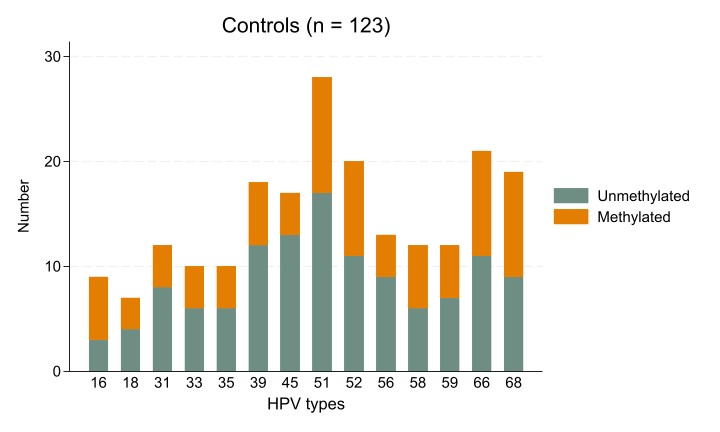 | | | 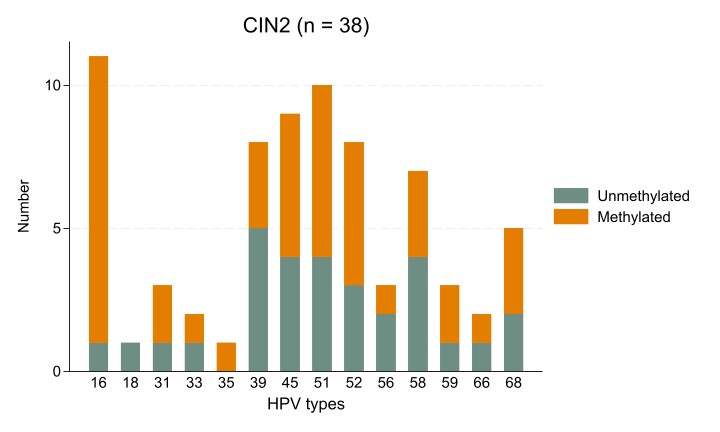 | | | 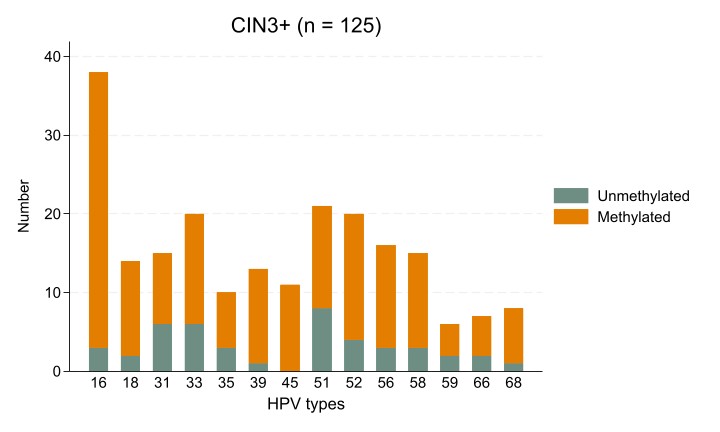 | | |
|  | | |  | | |  | | |
|  | **CNTRL** | | | **CIN2** | | | **CIN3+** | | |
|  | **N** | ***ASCL1/LHX8* methylation positivity* %, (95% CI)** | | **N** | ***ASCL1/LHX8* methylation positivity* %, (95% CI)** | | **N** | ***ASCL1/LHX8* methylation positivity* %, (95% CI)** | |
| **HPV16/18** | 14 | 57.1 (29.0-82.3) | | 12 | 83.3 (51.6-98.0) | | 51 | 90.2 (78.6-96.7) | |
| **Other alpha- 7/9**** | 89 | 39.3 (29.1-50.3) | | 25 | 60.0 (38.7-78.9) | | 85 | 76.5 (66.0-84.9) | |
| **Non-Other alpha- 7/9***** | 52 | 40.4 (27.0-54.9) | | 14 | 57.1 (28.9-82.3) | | 37 | 70.3 (53.0-84.1) | |
