# Supplementary material for: Performance of ASLC1/LHX8 DNA methylation and extended HPV genotyping in first-void urine for high-grade cervical intraepithelial neoplasia detection in an HPV-positive referral population - a cross-sectional study
Source: Research Square preprint supplement (doi:10.21203/rs.3.rs-8249226/v1), 2025-12-11
Supplement: Supplementary file 2 [file e6efc89feed9b5106502927e.docx]

**Supplementary Tables:**

**Table S2:** Clinical performance of the marker panel *ASCL1/LHX8* in HPV-positive first-void urine samples (n=286) using different methylation positivity thresholds and stratified by age groups and referral status.

|  | **Marker panel *ASCL1/LHX8**** | | **Marker panel *ASCL1/LHX8***** | |
| --- | --- | --- | --- | --- |
|  | n/N | % (95% CI) | n/N | % (95% CI) |
| CIN3+ sensitivity | 99/125 | 79.2 (71.0-85.9) | 88/125 | 70.4 (61.6-78.2) |
| Age groups (years) |  |  |  |  |
| <30 (n=70) | 19/27 | 70.4 (49.8-86.2) | 16/27 | 59.3 (38.8-77.6) |
| 30-64 (n=178) | 80/98 | 81.6 (72.5-88.7) | 72/98 | 73.4 (63.5-82.0) |
| Referral status |  |  |  |  |
| Colposcopy cases (n=157) | 33/44 | 75.0 (60.0-86.8) | 29/44 | 66.0 (50.1-79.5) |
| LLETZ cases (n=91) | 66/81 | 81.5 (71.3-89.2) | 59/81 | 72.8 (61.8-82.1) |
|  |  |  |  |  |
| CIN2+ sensitivity | 123/163 | 75.5 (68.1-81.9) | 111/163 | 68.1 (60.4-75.2) |
| Age groups (years) |  |  |  |  |
| <30 (n=78) | 22/35 | 62.8 (44.9-78.5) | 18/35 | 51.4 (34.0-68.6) |
| 30-64 (n=208) | 101/128 | 78.9 (70.8-85.6) | 93/128 | 72.6 (64.0-80.2) |
| Referral status |  |  |  |  |
| Colposcopy cases (n=176) | 43/63 | 68.3 (55.3-79.4) | 38/63 | 60.3 (47.2-72.4) |
| LLETZ cases (n=110) | 80/100 | 80.0 (70.8-87.3) | 73/100 | 73.0 (63.2-81.4) |
|  |  |  |  |  |
| ≤CIN1 specificity | 70/123 | 57.0 (47.8-65.8) | 84/123 | 68.3 (59.3-76.4) |
| Age groups (years) |  |  |  |  |
| <30 (n=78) | 36/43 | 83.7 (69.3-93.1) | 38/43 | 88.4 (74.9-96.1) |
| 30-64 (n=208) | 34/80 | 42.5 (31.5-54.1) | 46/80 | 57.5 (45.9-68.4) |
| Referral status |  |  |  |  |
| Colposcopy cases (n=176) | 66/113 | 58.4 (49.0-67.6) | 78/113 | 69.0 (59.6-77.4) |
| LLETZ cases (n=110) | 4/10 | 40.0 (12.2-73.7) | 6/10 | 60.0 (26.2-87.8) |

LLETZ: Large Loop Electrosurgical Excision of the Transformation Zone.CIN: cervical intraepithelial neoplasia grade 1-3; ≤CIN1: women with no dysplasia or CIN1, CIN2+: CIN2, CIN3, adenocarcinoma in situ (AIS), and cancer. CIN3+: CIN3, AIS, and cancer. n/N: CIN3+ sensitivity: True positive/total CIN3+ cases. CIN2+ sensitivity: True positive/total CIN2+ cases. ≤CIN1 specificity: true negative/total ≤CIN1. *) *ASCL1/LHX8* methylationpositivity threshold in first-void urine was set at predefined 70% specificity for ≤CIN1 as defined by Van Keer et al (in revision). **) *ASCL1/LHX8* methylationpositivity threshold in first-void urine was set at predefined 80% specificity for ≤CIN1 as defined by Van Keer et al (in revision).

**Table S3:** Comparison of clinical performance of the methylation marker panel *ASCL1/LHX8* in paired HPV-positive first-void urine and cervical samples using different methylation positivity thresholds and stratified by age groups and referral status.

|  | **First-void urine** | | | | **Cervical samples** | | | |
| --- | --- | --- | --- | --- | --- | --- | --- | --- |
|  | Marker panel *ASCL1/LHX8** | | Marker panel *ASCL1/LHX8*** | | Marker panel *ASCL1/LHX8*# | | Marker panel *ASCL1/LHX8*## | |
|  | n/N | % (95% CI) | n/N | % (95% CI) | n/N | % (95% CI) | n/N | % (95% CI) |
| CIN3+ sensitivity | 95/121 | 79.0 (70.1-85.5) | 85/121 | 70.3 (61.3-78.2) | 107/121 | 88.4 (81.3-93.5) | 104/121 | 86.0 (78.6-91.6) |
| Age groups |  |  |  |  |  |  |  |  |
| < 30 (n=64) | 19/27 | 70.4 (50.0-86.2) | 16/27 | 59.3 (38.8-77.6) | 23/27 | 85.2 (66.3-95.8) | 23/27 | 85.2 (66.2-95.8) |
| 30-64 (n=162) | 76/94 | 81.0 (71.4-88.2) | 69/94 | 73.4 (63.3-82.0) | 84/94 | 89.4 (81.3-94.7) | 81/94 | 86.2 (77.5-92.4) |
| Referral status |  | |  | |  | | | |
| Colposcopy cases (n=138) | 31/42 | 73.8 (58.0-86.1) | 28/42 | 67.0 (50.5-80.4) | 38/42 | 90.5 (77.4-97.3) | 37/42 | 88.0 (74.4-96.0) |
| LLETZ cases (n=88) | 64/79 | 81.0 (70.6-89.0) | 57/79 | 72.2 (61.0-81.7) | 69/79 | 87.3 (78.0-93.8) | 67/79 | 84.8 (74.9-91.9) |
|  |  | |  | |  | | | |
| CIN2+ sensitivity | 119/159 | 74.8 (67.3-81.4) | 108/159 | 68.0 (60.1-75.1) | 137/159 | 86.2 (79.8-91.1) | 131/159 | 82.3 (75.6-88.0) |
| Age groups |  |  |  |  |  |  |  |  |
| < 30 (n=72) | 22/35 | 62.8 (44.9-78.5) | 18/35 | 51.4 (34.0-68.6) | 28/35 | 80.0 (63.1-91.6) | 27/35 | 77.1 (60.0-89.6) |
| 30-64 (n=192) | 97/124 | 78.2 (70.0-85.1) | 90/124 | 72.6 (63.8-80.2) | 109/124 | 87.9 (80.8-93.1) | 104/124 | 83.8 (76.2-90.0) |
| Referral status |  | |  | |  | | | |
| Colposcopy cases (n=157) | 41/61 | 67.2 (54.0-78.7) | 37/61 | 61.0 (47.3-72.9) | 52/61 | 85.2 (73.8-93.0) | 49/61 | 80.3 (68.2-89.4) |
| LLETZ cases (n=107) | 78/98 | 80.0 (70.3-87.1) | 71/98 | 72.5 (62.5-81.0) | 85/98 | 86.7 (78.4-92.7) | 82/98 | 83.7 (74.8-90.4) |
|  |  |  |  |  |  |  |  |  |
| ≤CIN1 specificity | 62/105 | 59.0 (49.0-68.5) | 73/105 | 70.0 (60.0-78.1) | 48/105 | 45.7 (36.0-55.7) | 57/105 | 54.3 (44.3-64.0) |
| Age groups |  |  |  |  |  |  |  |  |
| < 30 (n=72) | 31/37 | 83.8 (68.0-93.8) | 33/37 | 89.1 (74.5-96.9) | 27/37 | 73.0 (55.9-86.2) | 29/37 | 78.4 (61.8-90.1) |
| 30-64 (192) | 31/68 | 46.0 (33.5-58.1) | 40/68 | 58.8 (46.2-70.6) | 21/68 | 30.9 (20.2-43.3) | 28/68 | 41.2 (29.4-53.8) |
| Referral status |  |  |  |  |  |  |  |  |
| Colposcopy cases (n=157) | 59/96 | 61.5 (51.0-71.2) | 68/96 | 70.8 (60.7-79.7) | 48/96 | 50.0 (39.6-60.4) | 55/96 | 57.3 (46.8-67.3) |
| LLETZ cases (n=107) | 3/9 | 33.3 (7.5-70.1) | 5/9 | 55.6 (21.2-86.3) | 0/9 | NA | 2/9 | 22.2 (2.8-60.0) |

LLETZ: Large Loop Electrosurgical Excision of the Transformation Zone. CIN: cervical intraepithelial neoplasia grade 1-3; ≤CIN1: women with no dysplasia or CIN1. CIN2+: CIN2, CIN3, adenocarcinoma in situ (AIS), and cancer. CIN3+: CIN3, adenocarcinoma in situ (AIS), and cancer. n/N: CIN3+ sensitivity: True positive/total CIN3+ cases. CIN2+ sensitivity: True positive/total CIN2+ cases. ≤CIN1 specificity: true negative/total ≤CIN1. *) *ASCL1/LHX8* methylationpositivity in first-void urine (test threshold set at 80% specificity (Van Keer et al in revision)). **) *ASCL1/LHX8* methylationpositivity in first-void urine (test threshold set at 80% specificity (Van Keer et al in revision)). #) *ASCL1/LHX8* methylationpositivity in cervical samples (test threshold set at 70% specificity Griffioen et al (submitted)). ##) *ASCL1/LHX8* methylationpositivity in cervical samples ( test threshold set at 80% specificity Griffioen et al (submitted)).

**Table S4:** Clinical performance of different triage strategies in HPV-positive first-void urine samples

|  | **CIN3+ sensitivity** | | **CIN2+ sensitivity** | | **≤CIN1 specificity** | |
| --- | --- | --- | --- | --- | --- | --- |
| **Triage strategies** | na | % (95% CI) | nb | % (95% CI) | nc | % (95% CI) |
| Marker panel *ASCL1/LHX8** | 88/125 | 70.4 (61.6-78.2) | 111/163 | 68.1 (60.4-75.2) | 84/123 | 68.3 (59.3-76.4) |
| HPV16/18 genotyping** | 51/125 | 40.8 (32.1-50.0) | 63/163 | 38.7 (31.1-46.6) | 109/123 | 88.6 (81.6-93.6) |
| HPV extended genotyping*** | 92/125 | 73.6 (65.0-81.1) | 115/163 | 71.0 (62.9-77.4) | 73/123 | 59.3 (50.1-68.1) |
| HPV16/18 genotyping with marker panel *ASCL1/LHX8* **** | 96/125 | 77.0 (68.4-83.9) | 121/163 | 74.2 (66.8-80.8) | 76/123 | 61.8 (52.6-70.4) |
| HPV extended genotyping with marker panel *ASCL1/LHX8****** | 110/125 | 88.0 (81.0-93.1) | 141/163 | 86.5 (80.3-91.3) | 54/123 | 43.9 (35.0-53.1) |

CIN: Cervical Intraepithelial Neoplasia grade 1 to 3, CIN3+: CIN3, AIS, and cancer, CIN2+: CIN2, CIN3, AIS, and cancer. ≤CIN1: No dysplasia or CIN grade 1. n/N: CIN3+ sensitivity: True positive/total CIN3+ cases. CIN2+ sensitivity: True positive/total CIN2+ cases. ≤CIN1 specificity: true negative/total ≤CIN1. *) *ASCL1/LHX8* methylationpositivity (test threshold set at 80% specificity (Van Keer et al, in revision)). **) HPV16/18 genotyping: Labelled positive if HPV16 and/or HPV18 were present. ***) Extended HPV genotyping: Labelled positive if HPV16, HPV18, HPV31, HPV33, and/or HPV52 were detected.****) HPV16/18 genotyping combined with *ASCL1/LHX8* methylation (test threshold set at 80% specificity (Van Keer et al, in revision)).*****) Extended HPV genotyping combined with *ASCL1/LHX8* methylation (test threshold set at 80% specificity (Van Keer et al, in revision)).
